# Supplementary material for: Skalen zur Erfassung der selbstbestimmten Motivation von Grundschulkindern (SESMO)
Source: Atypon-hosted journal article supplement (doi:10.1024/1010-0652/a000356), 2023-01-03
Supplement: 1010-0652_a000356_esm1.pdf [file 1010-0652_a000356_esm1.pdf]

## Elektronisches Supplement 1

### Mplus-Inputs

1. Mplus-Input für die CFA-Modelle S1
2. Mplus-Input für die CFA-Modelle höherer Ordnung S1
3. Mplus-Input für die B-CFA-Modelle S2
4. Mplus-Input für die ESEM-Modelle S2
5. Mplus-Input für die B-ESEM-Modelle S3-4

*Anmerkung.* Redundante Abschnitte werden nicht wiederholt. Es werden nur Abschnitte dargestellt, die sich von früheren Modellen unterscheiden.

#### CFA (3-Faktorenmodell)

```
DATA: FILE IS MPLUS.dat;
VARIABLE: NAMES ARE sex age a1-a23 b1 b2 b3 c1 c2 c3 f1 f2 f3 g1-g6 h1-h6 i1-i23 j1
j2 j3 k1 k2 k3 l1-l6 m1-m6 n1 n2 n3 MNre DNre ZMNre ZDNre;
USEVARIABLES ARE i5 i11 i17 i3 i13 i19 i9 i16 i22 i12 i18 i23 j1 j2 j3;
MISSING = all (999);
ANALYSIS: ESTIMATOR IS MLR;
MODEL:
AUT by i5 i11 i17 i3 i13 i19;
KONT by i12 i18 i23 i9 i16 i22;
AMOT by j1 j2 j3;
OUTPUT: SAMPSTAT STANDARDIZED RESIDUAL CINTERVAL TECH1 TECH2
TECH4 MODINDICES(ALL);
```

#### CFA (5-Faktorenmodell)

```
DATA: FILE IS MPLUS.dat;
VARIABLE: NAMES ARE sex age a1-a23 b1 b2 b3 c1 c2 c3 f1 f2 f3 g1-g6 h1-h6 i1-i23 j1
j2 j3 k1 k2 k3 l1-l6 m1-m6 n1 n2 n3 MNre DNre ZMNre ZDNre;
USEVARIABLES ARE i5 i11 i17 i3 i13 i19 i9 i16 i22 i12 i18 i23 j1 j2 j3;
MISSING = all (999);
ANALYSIS: ESTIMATOR IS MLR;
MODEL:
INTR by i5 i11 i17;
IDENT by i3 i13 i19;
INTRO by i12 i18 i23;
EXTR by i9 i16 i22;
AMOT by j1 j2 j3;
```

#### CFA höherer Ordnung

```
MODEL:
INTR by i5 i11 i17;
IDENT by i3 i13 i19;
INTRO by i12 i18 i23;
EXTR by i9 i16 i22;
AMOT by j1 j2 j3;
AUT by INTR IDENT;
KONT by INTRO EXTR;
```

### B-CFA

MODEL:

GF by i5\* i11 i17 i3 i13 i19 i12 i18 i23 i9 i16 i22 j1 j2 j3;  
INTR by i5\* i11 i17;  
IDENT by i3\* i13 i19;  
INTRO by i12\* i18 i23;  
EXTR by i9\* i16 i22;  
AMOT by j1\* j2 j3;

INTR@1; IDENT@1; INTRO@1; EXTR@1; AMOT@1;  
INTR with IDENT@0;  
INTR with INTRO@0;  
INTR with EXTR@0;  
INTR with AMOT@0;  
IDENT with INTRO@0;  
IDENT with EXTR@0;  
IDENT with AMOT@0;  
INTRO with EXTR@0;  
INTRO with AMOT@0;  
EXTR with AMOT@0;  
GF with INTR@0;  
GF with IDENT@0;  
GF with INTRO@0;  
GF with EXTR@0;  
GF with AMOT@0;

### ESEM

ANALYSIS: ESTIMATOR IS MLR;  
ITERATIONS = 10000;  
ROTATION = TARGET;  
MODEL:

INTR by i5 i11 i17  
    i3~0 i13~0 i19~0  
    i12~0 i18~0 i23~0  
    i9~0 i16~0 i22~0  
    j1~0 j2~0 j3~0(\*1);  
IDENT by i3 i13 i19  
    i5~0 i11~0 i17~0  
    i12~0 i18~0 i23~0  
    i9~0 i16~0 i22~0  
    j1~0 j2~0 j3~0(\*1);  
INTRO by i12 i18 i23  
    i5~0 i11~0 i17~0  
    i3~0 i13~0 i19~0  
    i9~0 i16~0 i22~0  
    j1~0 j2~0 j3~0(\*1);  
EXTR by i9 i16 i22  
    i5~0 i11~0 i17~0  
    i3~0 i13~0 i19~0  
    i12~0 i18~0 i23~0  
    j1~0 j2~0 j3~0(\*1);  
AMOT by j1 j2 j3  
    i5~0 i11~0 i17~0  
    i3~0 i13~0 i19~0  
    i12~0 i18~0 i23~0  
    i9~0 i16~0 i22~0(\*1);

**B-ESEM**

ANALYSIS: ESTIMATOR IS MLR;  
ITERATIONS = 10000;  
ROTATION = TARGET (orthogonal);  
MODEL:

GF by i5 i11 i17  
i3 i13 i19  
i12 i18 i23  
i9 i16 i22  
j1 j2 j3(\*1);  
INTR by i5 (b1)  
i11 (b2)  
i17 (b3)  
i3~0 i13~0 i19~0  
i12~0 i18~0 i23~0  
i9~0 i16~0 i22~0  
j1~0 j2~0 j3~0(\*1);  
IDENT by i3 (b4)  
i13 (b5)  
i19 (b6)  
i5~0 i11~0 i17~0  
i12~0 i18~0 i23~0  
i9~0 i16~0 i22~0  
j1~0 j2~0 j3~0(\*1);  
INTRO by i12 (b7)  
i18 (b8)  
i23 (b9)  
i5~0 i11~0 i17~0  
i3~0 i13~0 i19~0  
i9~0 i16~0 i22~0  
j1~0 j2~0 j3~0(\*1);  
EXTR by i9 (b10)  
i16 (b11)  
i22 (b12)  
i5~0 i11~0 i17~0  
i3~0 i13~0 i19~0  
i12~0 i18~0 i23~0  
j1~0 j2~0 j3~0(\*1);  
AMOT by j1 (b13)  
j2 (b14)  
j3 (b15)  
i5~0 i11~0 i17~0  
i3~0 i13~0 i19~0  
i12~0 i18~0 i23~0  
i9~0 i16~0 i22~0(\*1);

i5(e1); i11(e2); i17(e3);  
i3(e4); i13(e5); i19(e6);  
i12(e7); i18(e8); i23(e9);  
i9(e10); i16(e11); i22(e12);  
j(e13); j2(e14); j3(e15);

MODEL CONSTRAINT:

! Die MODEL CONSTRAINT-Option wurde zur Berechnung der Omega-Koeffizienten angewendet.

```
new sumload6 sumevar6 omega6;
sumload6=(b1+b2+b3+b4+b5+b6+b7+b8+b9+b10+b11+b12+b13+b14+b15)**2;
sumevar6=e1+e2+e3+e4+e5+e6+e7+e8+e9+e10+e11+e12+e13+e14+e15;
omega6=sumload6/(sumload6+sumevar6);

new sumload1 sumevar1 omega1;
sumload1=(b1+b2+b3)**2;
sumevar1=e1+e2+e3;
omega1=sumload1/(sumload1+sumevar1);

new sumload2 sumevar2 omega2;
sumload2=(b4+b5+b6)**2;
sumevar2=e4+e5+e6;
omega2=sumload2/(sumload2+sumevar2);

new sumload3 sumevar3 omega3;
sumload3=(b7+b8+b9)**2;
sumevar3=e7+e8+e9;
omega3=sumload3/(sumload3+sumevar3);

new sumload4 sumevar4 omega4;
sumload4=(b10+b11+b12)**2;
sumevar4=e10+e11+e12;
omega4=sumload4/(sumload4+sumevar4);

new sumload5 sumevar5 omega5;
sumload5=(b13+b14+b15)**2;
sumevar5=e13+e14+e15;
omega5=sumload5/(sumload5+sumevar5);
```
