# Supplementary material for: Skalen zur Erfassung der selbstbestimmten Motivation von Grundschulkindern (SESMO)
Source: Atypon-hosted journal article supplement (doi:10.1024/1010-0652/a000356), 2023-01-03
Supplement: 1010-0652_a000356_esm2.pdf [file 1010-0652_a000356_esm2.pdf]

**Elektronisches Supplement 2**

**Tabelle E1.** Korrelationen zwischen den fünf latenten Faktoren für die fünf motivationalen Regulationstypen

|                      | Korrelationen innerhalb desselben Faches |              |                |                | Korrelationen über die Fächer hinweg |                |              |               |               |
|----------------------|------------------------------------------|--------------|----------------|----------------|--------------------------------------|----------------|--------------|---------------|---------------|
|                      | Identifiziert                            | Introjiert   | Extrinsisch    | Amotiviert     | Intrinsisch                          | Identifiziert  | Introjiert   | Extrinsisch   | Amotiviert    |
| <b>Intrinsisch</b>   |                                          |              |                |                |                                      |                |              |               |               |
| Mathematik           | .40*** (0.03)                            | -.08* (0.04) | -.22*** (0.04) | -.58*** (0.03) | .17***(0.04)                         | .18*** (0.04)  | .02 (0.04)   | -.06 (0.04)   | -.17***(0.04) |
| Deutsch              | .41*** (0.05)                            | -.01 (0.04)  | -.20*** (0.04) | -.50*** (0.04) |                                      |                |              |               |               |
| <b>Identifiziert</b> |                                          |              |                |                |                                      |                |              |               |               |
| Mathematik           |                                          | .04 (0.04)   | -.04 (0.03)    | -.23*** (0.04) | .25** (0.05)                         | .44*** (0.04)  | .05 (0.04)   | .01 (0.04)    | -.17***(0.05) |
| Deutsch              |                                          | -.02 (0.04)  | -.12** (0.04)  | -.29*** (0.04) |                                      |                |              |               |               |
| <b>Introjiert</b>    |                                          |              |                |                |                                      |                |              |               |               |
| Mathematik           |                                          |              | .48*** (0.03)  | .16*** (0.04)  | -.03 (0.04)                          | -.07 (0.04)    | .60***(0.03) | .42*** (0.04) | .07 (0.04)    |
| Deutsch              |                                          |              | .51*** (0.04)  | .06 (0.04)     |                                      |                |              |               |               |
| <b>Extrinsisch</b>   |                                          |              |                |                |                                      |                |              |               |               |
| Mathematik           |                                          |              |                | .18*** (0.04)  | -.07 (0.04)                          | -.08 (0.04)    | .37***(0.04) | .60***(0.04)  | .12** (0.04)  |
| Deutsch              |                                          |              |                | .18*** (0.05)  |                                      |                |              |               |               |
| <b>Amotiviert</b>    |                                          |              |                |                |                                      |                |              |               |               |
| Mathematik           |                                          |              |                |                | -.06 (0.04)                          | -.16*** (0.04) | .07 (0.04)   | .06 (0.04)    | .31*** (0.04) |

*Anmerkungen:* Alle Korrelationen wurden aus den 5-Faktorenmodellen der CFA (M3, siehe Tabelle 2) entnommen. Die Werte in Klammern stellen die Standardfehler dar. Die kursiv markierten Korrelationen unterscheiden sich signifikant zwischen den Fächern. \*\*\* $p < .001$ , \*\* $p < .01$ , \* $p < .05$ .
